# Supplementary material for: The Prevalence of Self-injurious Behaviour in Autism: A Meta-analytic Study
Source: PubMed Central journal article supplement (PMC7557528; doi:10.1007/s10803-020-04443-1), 2020-04-15
Supplement: 10803_2020_4443_MOESM3_ESM.pdf [file 10803_2020_4443_MOESM3_ESM.pdf]

**The Prevalence of Self-Injury in Autism: A Meta-Analytic Review, Journal of Autism and Developmental Disorders**

Authors: Dr Catherine Steinfeldt-Kristensen, Dr Chris A. Jones & Dr Caroline Richards,  
University of Birmingham

**Corresponding Author:**

Dr Caroline Richards

School of Psychology  
University of Birmingham  
Edgbaston  
Birmingham  
B15 2TT  
UK  
[c.r.richards@bham.ac.uk](mailto:c.r.richards@bham.ac.uk)

0121 4158098

### Supplementary Materials 3: Tables and Forest Plots of individual topographies of self-injurious behaviour

**Table 9** Reporting of the prevalence rates and confidence intervals for hair pulling.

| Study Name          | PR   | 95%-CI             | Weighting in Random Effects Model |
|---------------------|------|--------------------|-----------------------------------|
| Akram 2017          | 0.1  | [ 0.0412; 0.1588]  | 7.9                               |
| Buono 2010          | 0.06 | [ 0.0012; 0.1188]  | 7.9                               |
| Duerden 2012        | 0.19 | [ 0.1312; 0.2488]  | 7.9                               |
| Folch 2018          | 0.06 | [ 0.0208; 0.0992]  | 8.6                               |
| Gulsrud 2018        | 0.01 | [ -0.0096; 0.0296] | 9.2                               |
| Handen 2018         | 0.25 | [ 0.2108; 0.2892]  | 8.6                               |
| Kamio 2002          | 0.02 | [ 0.0004; 0.0396]  | 9.2                               |
| Maddox 2017         | 0.12 | [ 0.0220; 0.2180]  | 6.1                               |
| Richards 2012       | 0.06 | [ 0.0208; 0.0992]  | 8.6                               |
| Richards 2017 Child | 0.09 | [ 0.0508; 0.1292]  | 8.6                               |
| Richards 2017 Adult | 0.1  | [ 0.0608; 0.1392]  | 8.6                               |
| Slingsby 2017       | 0.02 | [ -0.0192; 0.0592] | 8.6                               |

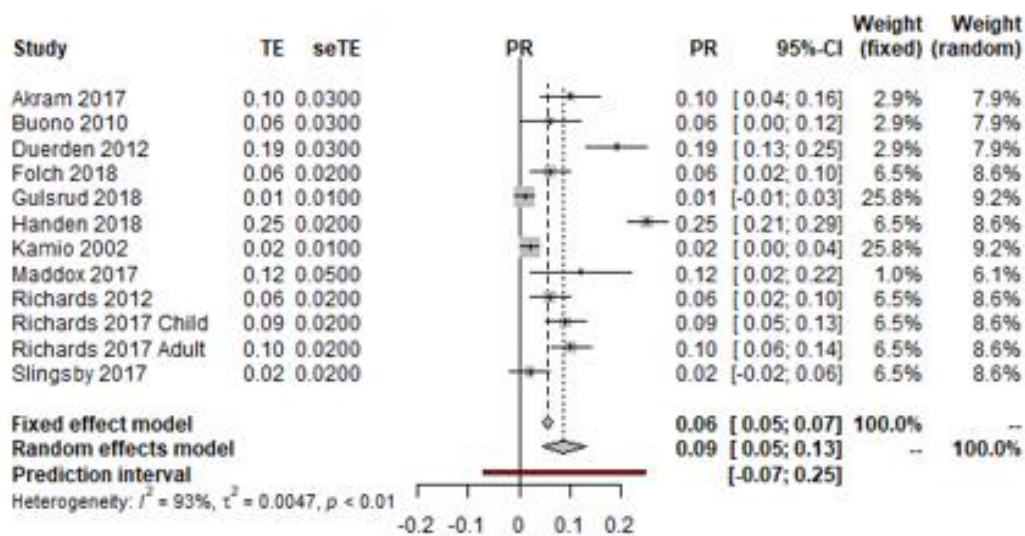

**Fig. 6** The pooled prevalence estimates for hair pulling in autism using the random-effects model

**Table 10** Reporting of the prevalence rates and confidence intervals for hand hitting.

| Study Name          | PR   | 95%-CI           | Weighting in Random Effects Model |
|---------------------|------|------------------|-----------------------------------|
| Akram 2017          | 0.16 | [0.0816; 0.2384] | 7.1                               |
| Buono 2010          | 0.41 | [0.2728; 0.5472] | 6                                 |
| Dominick 2007       | 0.17 | [0.0720; 0.2680] | 6.8                               |
| Duerden 2012        | 0.34 | [0.2616; 0.4184] | 7.1                               |
| Folch 2018          | 0.32 | [0.2416; 0.3984] | 7.1                               |
| Gulsrud 2018        | 0.09 | [0.0508; 0.1292] | 7.6                               |
| Handen 2018         | 0.48 | [0.4212; 0.5388] | 7.4                               |
| Hattier 2011        | 0.06 | [0.0404; 0.0796] | 7.8                               |
| Lecavalier 2006     | 0.16 | [0.1208; 0.1992] | 7.6                               |
| Maddox 2017         | 0.12 | [0.0220; 0.2180] | 6.8                               |
| Richards 2012       | 0.15 | [0.0912; 0.2088] | 7.4                               |
| Richards 2017 Child | 0.25 | [0.1912; 0.3088] | 7.4                               |
| Richards 2017 Adult | 0.28 | [0.2212; 0.3388] | 7.4                               |
| Slingsby 2017       | 0.22 | [0.1024; 0.3376] | 6.4                               |

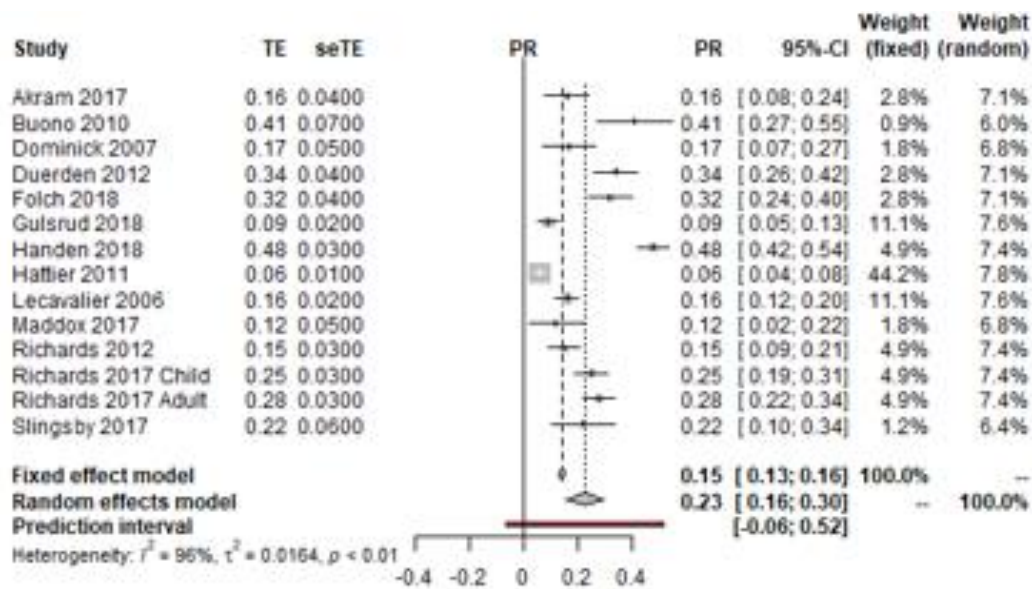

**Fig. 7** The pooled prevalence estimates for hand hitting in autism using the random-effects model

**Table 11.** Reporting of the prevalence rates and confidence intervals for head banging.

| Study Name    | PR     | 95%-CI           | Weighting in Random Effects Model |
|---------------|--------|------------------|-----------------------------------|
| Dominick 2007 | 0.2200 | [0.1024; 0.3376] | 14.3                              |
| Folch 2018    | 0.1000 | [0.0608; 0.1392] | 49.9                              |
| Gulsrud 2018  | 0.1000 | [0.0412; 0.1588] | 35.9                              |

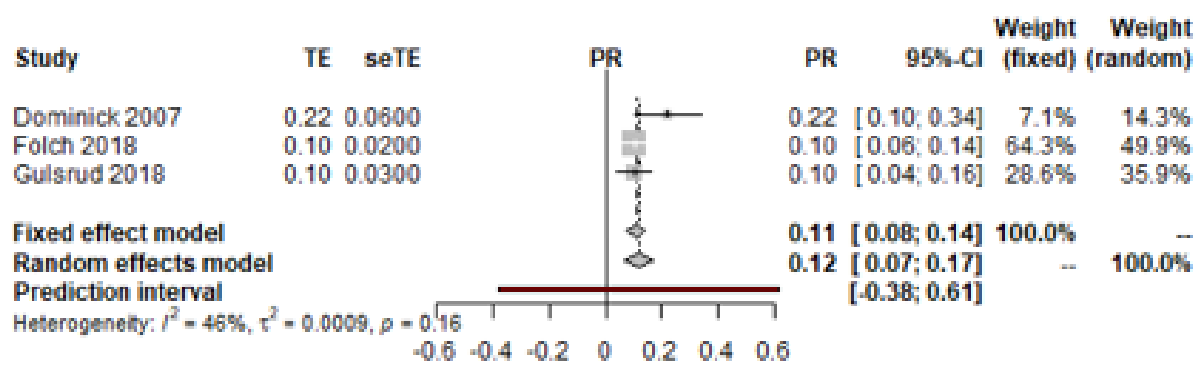

**Fig. 8** The pooled prevalence estimates for head banging in autism using the random-effects model

**Table 12.** Reporting of the prevalence rates and confidence intervals for hitting self against objects.

| Study Name          | PR   | 95%-CI %          | Weighting in Random Effects Model |
|---------------------|------|-------------------|-----------------------------------|
| Duerden 2012        | 0.3  | [ 0.2412; 0.3588] | 14.2                              |
| Handen 2018         | 0.47 | [ 0.4112; 0.5288] | 14.2                              |
| Hattier 2011        | 0.09 | [ 0.0704; 0.1096] | 14.9                              |
| Richards 2012       | 0.08 | [ 0.0408; 0.1192] | 14.6                              |
| Richards 2017 Child | 0.16 | [ 0.1012; 0.2188] | 14.2                              |
| Richards 2017 Adult | 0.16 | [ 0.1012; 0.2188] | 14.2                              |
| Slingsby 2017       | 0.07 | [-0.0084; 0.1484] | 13.6                              |

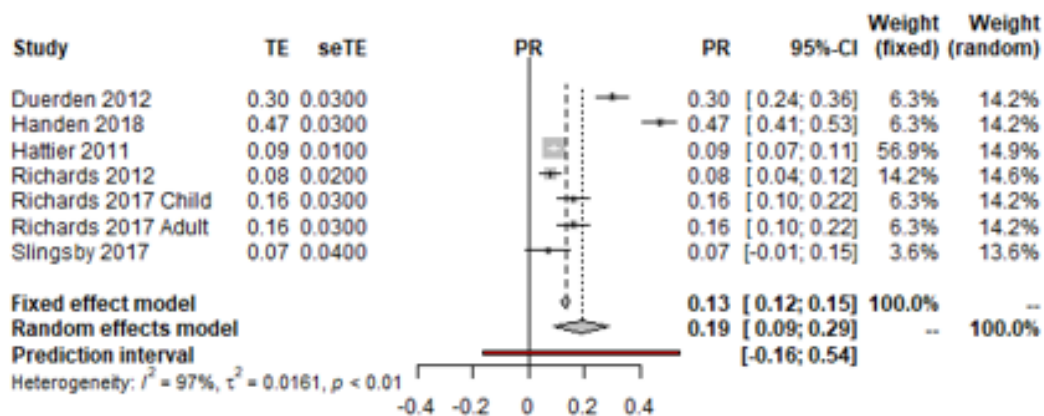

**Fig. 9** The pooled prevalence estimates for hitting self against objects in autism using the random-effects model

**Table 13.** Reporting of the prevalence rates and confidence intervals for object hitting.

| Study Name          | PR   | 95%-CI %W        | Weighting in Random Effects Model |
|---------------------|------|------------------|-----------------------------------|
| Buono 2010          | 0.41 | [0.2728; 0.5472] | 9.1                               |
| Duerden 2012        | 0.18 | [0.1212; 0.2388] | 13.2                              |
| Handen 2018         | 0.22 | [0.1808; 0.2592] | 14                                |
| Maddox 2017         | 0.14 | [0.0420; 0.2380] | 11.2                              |
| Richards 2012       | 0.05 | [0.0108; 0.0892] | 14                                |
| Richards 2017 Child | 0.06 | [0.0208; 0.0992] | 14                                |
| Richards 2017 Adult | 0.03 | [0.0104; 0.0496] | 14.5                              |
| Slingsby 2017       | 0.17 | [0.0524; 0.2876] | 10.1                              |

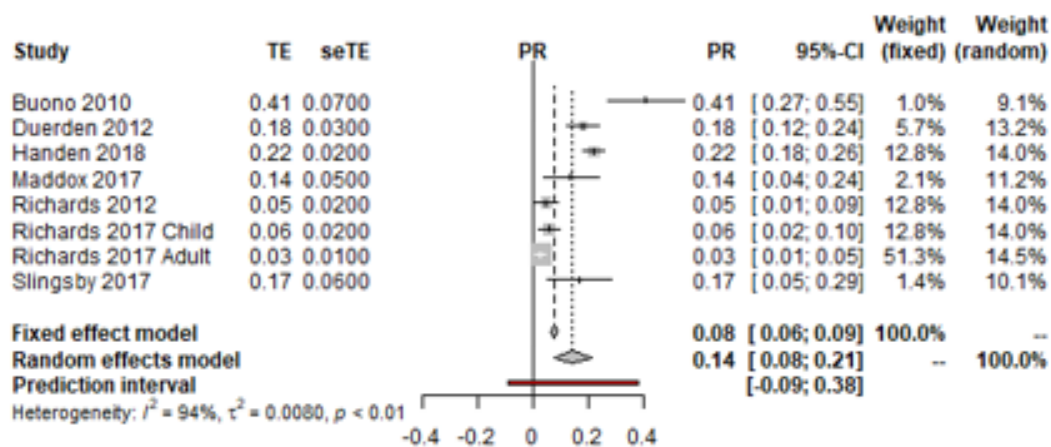

**Fig. 10** The pooled prevalence estimates for object hitting in autism using the random-effects model

**Table 14.** Reporting of the prevalence rates and confidence intervals for inserting objects in cavities.

| Study Name          | PR   | 95%-CI            | Weighting in Random Effects Model |
|---------------------|------|-------------------|-----------------------------------|
| Buono 2010          | 0.35 | [ 0.2128; 0.4872] | 3.8                               |
| Duerden 2012        | 0.18 | [ 0.1212; 0.2388] | 9.3                               |
| Folch 2018          | 0.01 | [-0.0096; 0.0296] | 13.2                              |
| Handen 2018         | 0.11 | [ 0.0708; 0.1492] | 11.4                              |
| Hattier 2011        | 0.02 | [ 0.0004; 0.0396] | 13.2                              |
| Lecavalier 2006     | 0.11 | [ 0.0708; 0.1492] | 11.4                              |
| Richards 2012       | 0.03 | [ 0.0104; 0.0496] | 13.2                              |
| Richards 2017 Child | 0.06 | [ 0.0208; 0.0992] | 11.4                              |
| Richards 2017 Adult | 0.05 | [ 0.0304; 0.0696] | 13.2                              |

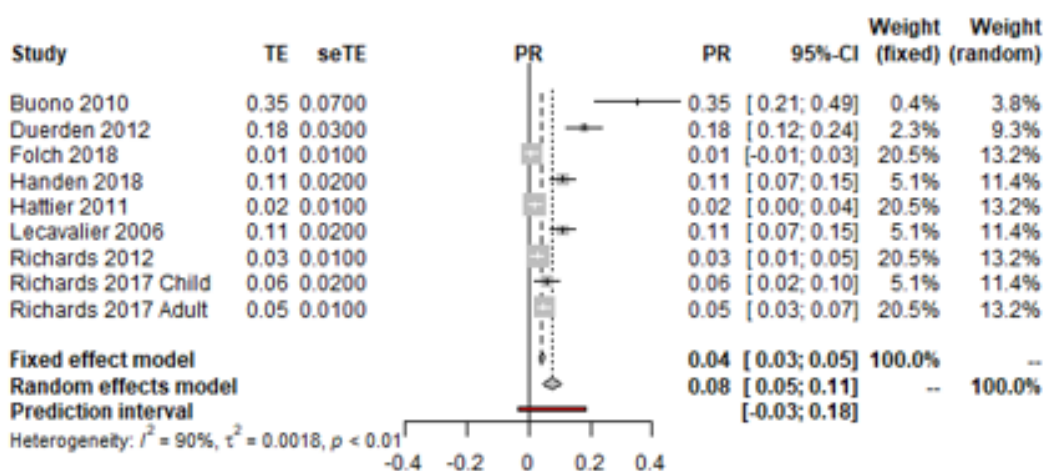

**Fig. 11** The pooled prevalence estimates for inserting objects in cavities in autism using the random-effects model

**Table 15.** Reporting of the prevalence rates and confidence intervals for rubbing self on surfaces.

| Study Name  | PR      | 95%-CI           | Weighting in Random Effects Model |
|-------------|---------|------------------|-----------------------------------|
| Akram 2017  | 0.0600  | [0.0012; 0.1188] | 73.5                              |
| Maddox 2017 | 0.01000 | [0.0020; 0.1980] | 26.5                              |

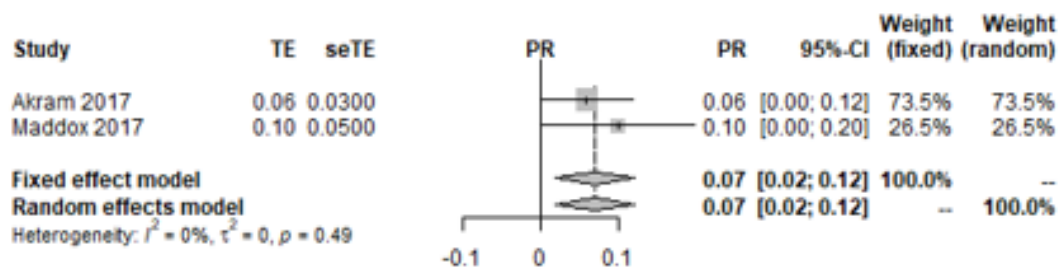

**Fig. 12** The pooled prevalence estimates for rubbing self on surfaces in autism using the random-effects model



**Table 16.** Reporting of the prevalence rates and confidence intervals for self-biting.

| Study Name          | PR   | 95%-CI            | Weighting in Random Effects Model |
|---------------------|------|-------------------|-----------------------------------|
| Akram 2017          | 0.11 | [ 0.0512; 0.1688] | 8.5                               |
| Buono 2010          | 0.39 | [ 0.2528; 0.5272] | 5.6                               |
| Dominick 2007       | 0.09 | [ 0.0116; 0.1684] | 7.8                               |
| Duerden 2012        | 0.26 | [ 0.2012; 0.3188] | 8.5                               |
| Gulsrud 2018        | 0.03 | [-0.0092; 0.0692] | 9.1                               |
| Handen 2018         | 0.3  | [ 0.2412; 0.3588] | 8.5                               |
| Kamio 2002          | 0.02 | [ 0.0004; 0.0396] | 9.5                               |
| Lecavalier 2006     | 0.05 | [ 0.0304; 0.0696] | 9.5                               |
| Richards 2012       | 0.09 | [ 0.0508; 0.1292] | 9.1                               |
| Richards 2017 Child | 0.17 | [ 0.1112; 0.2288] | 8.5                               |
| Richards 2017 Adult | 0.16 | [ 0.1208; 0.1992] | 9.1                               |
| Slingsby 2017       | 0.17 | [ 0.0524; 0.2876] | 6.3                               |

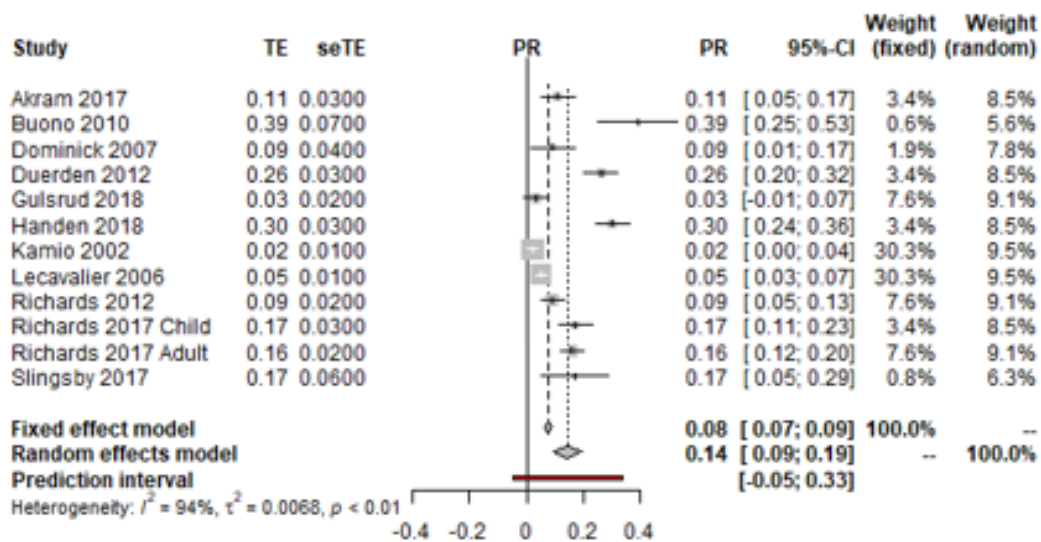

**Fig. 13** The pooled prevalence estimates for self-biting in autism using the random-effects model

**Table 17.** Reporting of the prevalence rates and confidence intervals for self-pinching.

| Study Name   | PR     | 95%-CI           | Weighting in Random Effects Model |
|--------------|--------|------------------|-----------------------------------|
| Akram 2017   | 0.1100 | [0.0512; 0.1688] | 15.7                              |
| Buono 2010   | 0.0600 | [0.0012; 0.1188] | 15.7                              |
| Hattier 2011 | 0.0600 | [0.0404; 0.0796] | 68.6                              |

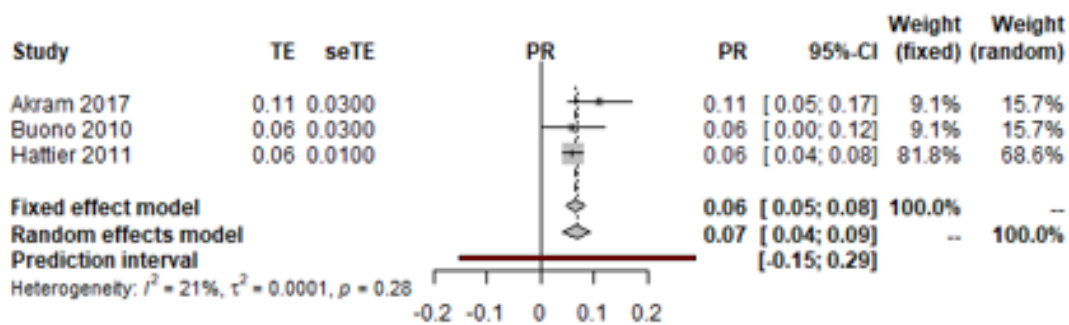

**Fig. 14** The pooled prevalence estimates for self-pinching in autism using the random-effects model

| Study Name          | PR   | 95%-CI            | %W | Weighting in Random Effects Model |
|---------------------|------|-------------------|----|-----------------------------------|
| Akram 2017          | 0.12 | [ 0.0416; 0.1984] |    | 6.9                               |
| Buono 2010          | 0.14 | [ 0.0420; 0.2380] |    | 6.2                               |
| Duerden 2012        | 0.23 | [ 0.1712; 0.2888] |    | 7.6                               |
| Folch 2018          | 0.15 | [ 0.0912; 0.2088] |    | 7.6                               |
| Gulsrud 2018        | 0.01 | [-0.0096; 0.0296] |    | 8.6                               |
| Handen 2018         | 0.43 | [ 0.3712; 0.4888] |    | 7.6                               |
| Hattier 2011        | 0.06 | [ 0.0404; 0.0796] |    | 8.6                               |
| Kamio 2002          | 0.04 | [ 0.0204; 0.0596] |    | 8.6                               |
| Lecavalier 2006     | 0.1  | [ 0.0804; 0.1196] |    | 8.6                               |
| Maddox 2017         | 0.36 | [ 0.2228; 0.4972] |    | 4.8                               |
| Richards 2012       | 0.09 | [ 0.0508; 0.1292] |    | 8.2                               |
| Richards 2017 Child | 0.12 | [ 0.0808; 0.1592] |    | 8.2                               |
| Richards 2017 Adult | 0.15 | [ 0.1108; 0.1892] |    | 8.2                               |

**Table 18.** Reporting of the prevalence rates and confidence intervals for self-scratching.

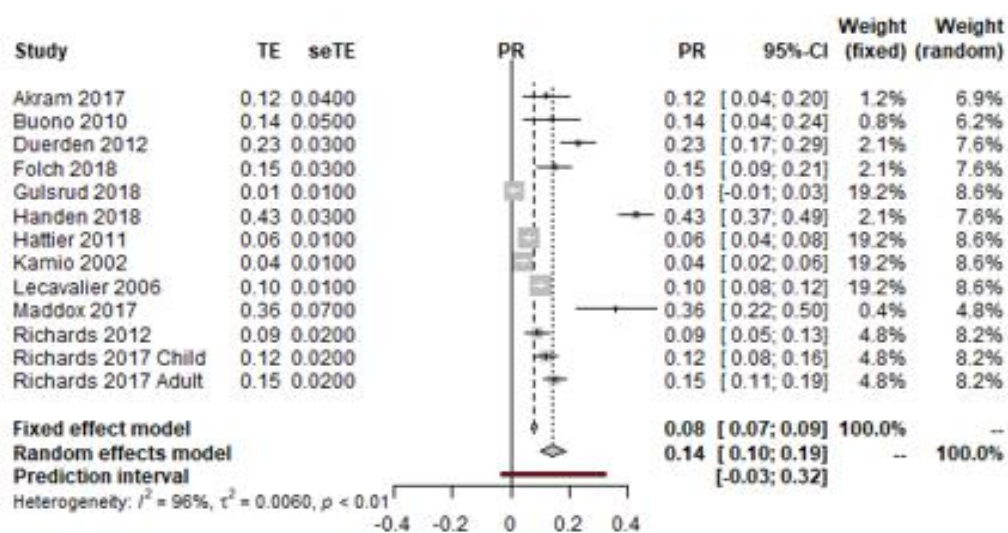

**Fig. 15** The pooled prevalence estimates for self-scratching in autism using the random-effects model

**Table 19.** Reporting of the prevalence rates and confidence intervals for wound interfering.

| Study Name  | PR   | 95%-CI %         | Weighting in Random Effects Model |
|-------------|------|------------------|-----------------------------------|
| Akram 2017  | 0.11 | [0.0512; 0.1688] | 27.7                              |
| Folch 2018  | 0.08 | [0.0408; 0.1192] | 62.3                              |
| Maddox 2017 | 0.12 | [0.0220; 0.2180] | 10                                |

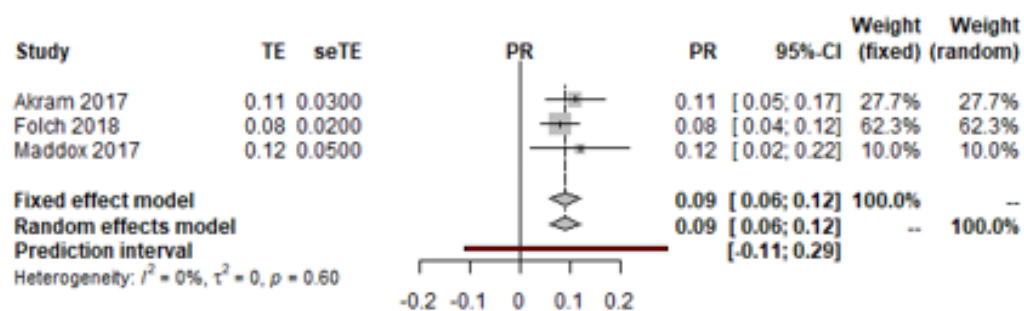

**Fig. 16** The pooled prevalence estimates for wound interfering in autism using the random-effects model

**Table 20.** Reporting of the prevalence rates and confidence intervals for self-cutting.

| Study Name          | PR   | 95%-CI %          | Weighting in Random Effects Model |
|---------------------|------|-------------------|-----------------------------------|
| Akram 2017          | 0.01 | [-0.0096; 0.0296] | 24.4                              |
| Folch 2018          | 0.01 | [-0.0096; 0.0296] | 24.4                              |
| Maddox 2017         | 0.17 | [ 0.0524; 0.2876] | 2.4                               |
| Richards 2017 Child | 0.04 | [ 0.0204; 0.0596] | 24.4                              |
| Richards 2017 Adult | 0.03 | [ 0.0104; 0.0496] | 24.4                              |

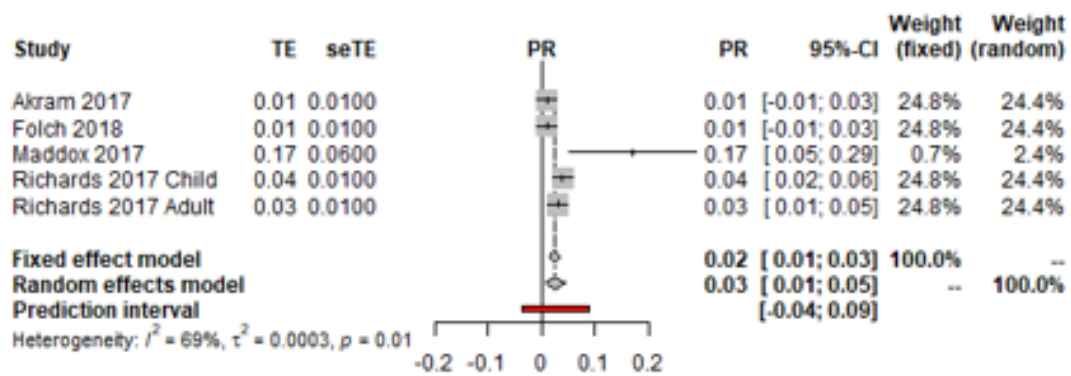

**Fig. 17** The pooled prevalence estimates for self-cutting in autism using the random-effects model

**Table 21.** Reporting of the prevalence rates and confidence intervals for skin picking.

| Study Name   | PR   | 95%-CI           | Weighting in Random Effects Model |
|--------------|------|------------------|-----------------------------------|
| Duerden 2012 | 0.25 | [0.1912; 0.3088] | 33.1                              |
| Gulsrud 2018 | 0.02 | [0.0004; 0.0396] | 33.8                              |
| Handen 2018  | 0.33 | [0.2712; 0.3888] | 33.1                              |

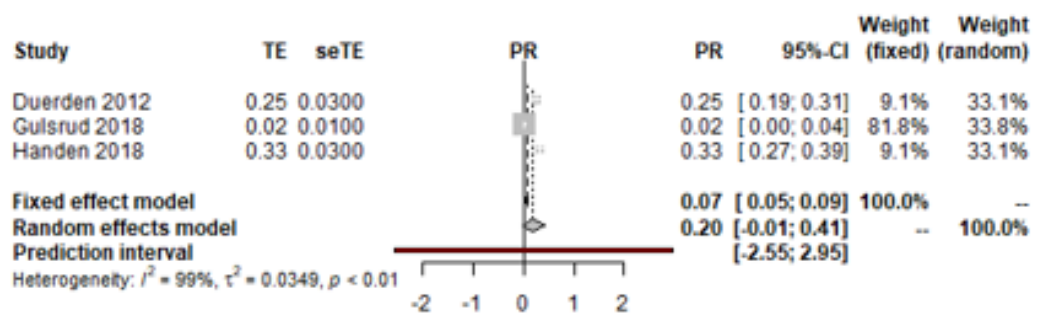

**Fig. 18** The pooled prevalence estimates for skin picking in autism using the random-effects model
