# Supplementary material for: The Prevalence of Self-injurious Behaviour in Autism: A Meta-analytic Study
Source: Springer Nature journal article supplement (doi:10.1007/s10803-020-04443-1), 2020-04-15
Supplement: MOESM1 [file 17899336]

**The Prevalence of Self-Injurious Behaviour in Autism: A Meta-Analytic Study, Journal of Autism and Developmental Disorders**

**Authors: Dr Catherine Steinfeldt-Kristensen, Dr Chris Jones & Dr Caroline Richards, University of Birmingham**

**Corresponding Author:**

Dr Caroline Richards

School of Psychology University of Birmingham Edgbaston Birmingham B15 2TT UK

c.r.richards@bham.ac.uk

0121 4158098

**Supplementary Material 1.** Quality Criteria for sample identification, autism assessment, measurement of ID and measurement of SIB/self-harm.

|                                                              | 0<br>Poor                                          | 1<br>Adequate                                                                                                                                                             | 2<br>Good                                                                                                                                            | 3<br>Excellent                                                                                                                                                                                                                   |
|--------------------------------------------------------------|----------------------------------------------------|---------------------------------------------------------------------------------------------------------------------------------------------------------------------------|------------------------------------------------------------------------------------------------------------------------------------------------------|----------------------------------------------------------------------------------------------------------------------------------------------------------------------------------------------------------------------------------|
| Sample Identification                                        | Not specified/reported                             | Single restricted or non-random sample e.g., a specialist clinic or previous research study<br>Single regional sample e.g., one autism school or adult service/group home | Multiple restricted or non-random samples e.g., multi-region specialist clinics<br>National non-random sampling e.g., national parent support groups | Random or total population sample                                                                                                                                                                                                |
| Assessment of autism                                         | Not specified/reported<br>Clinician judgement only | Screening instrument e.g., SCQ, M-CHAT<br>Clinician judgement against specified diagnostic criteria e.g., DSM-IV or ICD-10                                                | Diagnostic instrument e.g., ADI-R, DISCO, ADOS, 3Di                                                                                                  | Consensus from multiple assessments, including at least one diagnostic instrument                                                                                                                                                |
| Measurement of intellectual disability: IQ                   | Not specified/reported<br>Clinician judgement only | Parent/carer report<br>Recruited from a specialist ID school                                                                                                              | Parent/carer report with a well validated measure                                                                                                    | Formal IQ test (e.g. Weschler Intelligence Scale for Children)                                                                                                                                                                   |
| Measurement of intellectual disability: adaptive functioning | Not specified/reported<br>Clinician judgement only | Parent/carer report                                                                                                                                                       | Parent/carer report with a well validated measure                                                                                                    | Formal measure of adaptive functioning (e.g. Vineland Adaptive Behaviour Scales)                                                                                                                                                 |
| Measurement of self-injurious behaviour/self-harm            | Not specified/reported                             | Parent/carer report                                                                                                                                                       | Direct observation of behaviour by clinician/researcher OR use of a formal, validated scale (SIB -Q, SIQ, CBQ)                                       | Consensus from multiple assessments including at least one direct observation or formal, validated scale ( <b>SIB -Q, SIQ, CBQ</b> to assess for presence of SIB /self-harm in combination with direct observation of behaviour) |
